# Supplementary material for: Synergistic effect of bimetallic Pd–Pt nanocrystals for highly efficient methanol oxidation electrocatalysts
Source: Royal Society of Chemistry journal article supplement (doi:10.1039/d3ra04837c), 2023-01-01
Supplement: d3ra04837c1.pdf [file d3ra04837c1.pdf]

## Supporting Information

### Synergistic Effect of Bimetallic Pd-Pt Nanocrystals for the Highly Efficient Methanol Oxidation Electrocatalysts

Respati K. Pramadewandaru,<sup>a</sup> Young Wook Lee,<sup>\*b</sup> and Jong Wook Hong<sup>\*a</sup>

<sup>a</sup>Department of Chemistry, University of Ulsan, Ulsan 44776, Korea. Email: [jwhong@ulsan.ac.kr](mailto:jwhong@ulsan.ac.kr)

<sup>b</sup>Department of Education Chemistry and Research Institute of Natural Sciences, Gyeongsang National University, Jinju 52828, Republic of Korea. Email: [lyw2020@gnu.ac.kr](mailto:lyw2020@gnu.ac.kr)

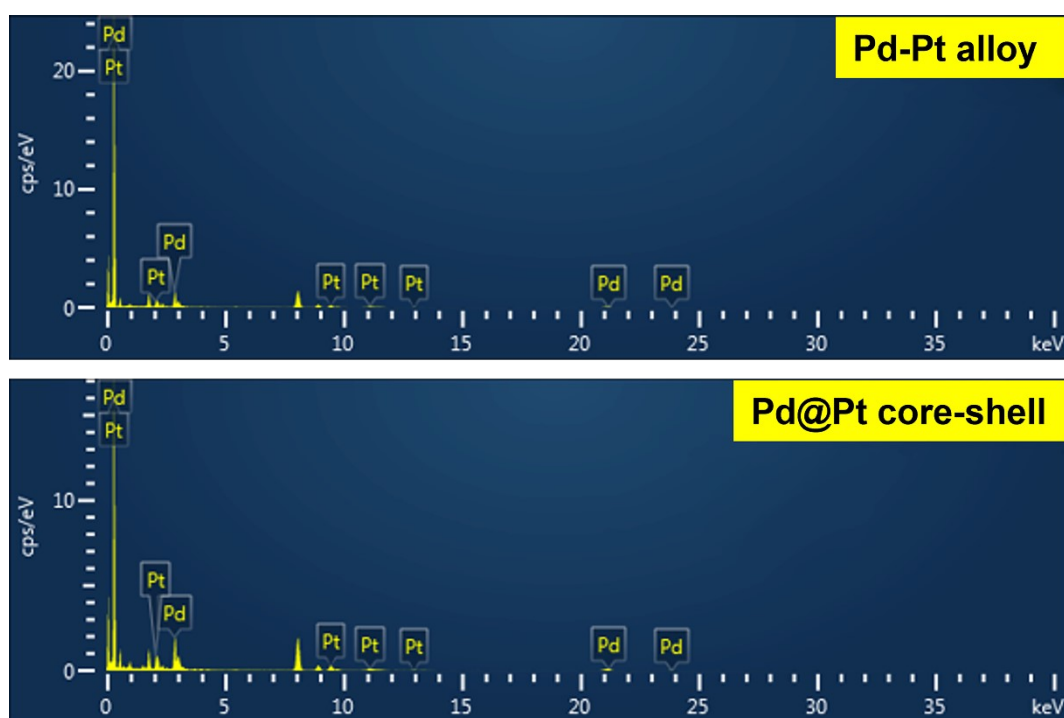

**Fig. S1.** EDS spectra of (a) Pd-Pt alloy and (b) Pd@Pt core-shell nanocubes.

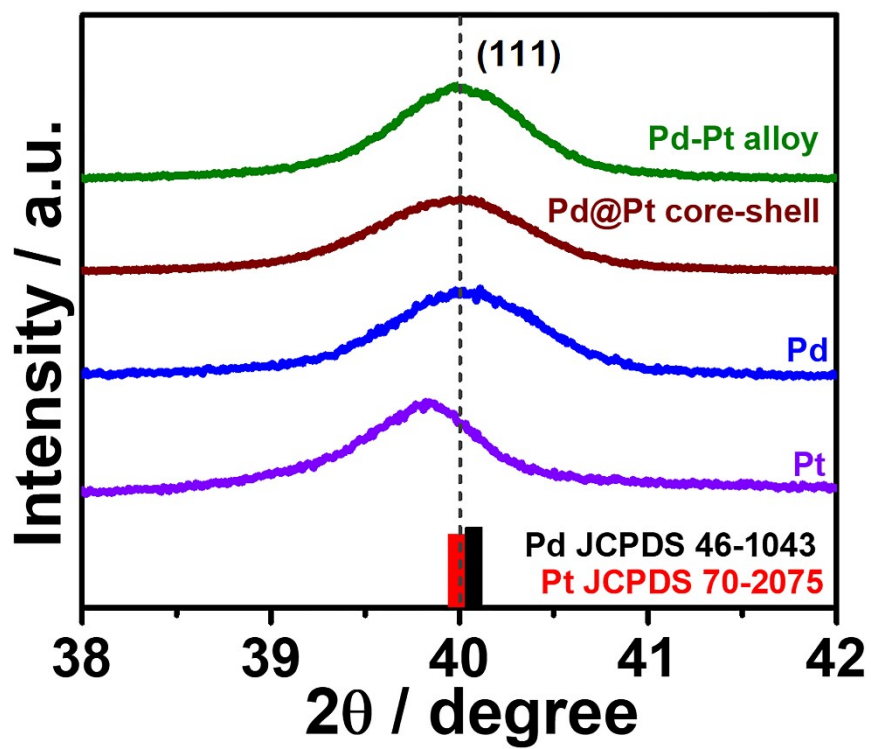

**Fig. S2.** The high-magnification XRD pattern of Pd-Pt alloy, Pd@Pt core-shell, Pd, and Pt nanocubes.

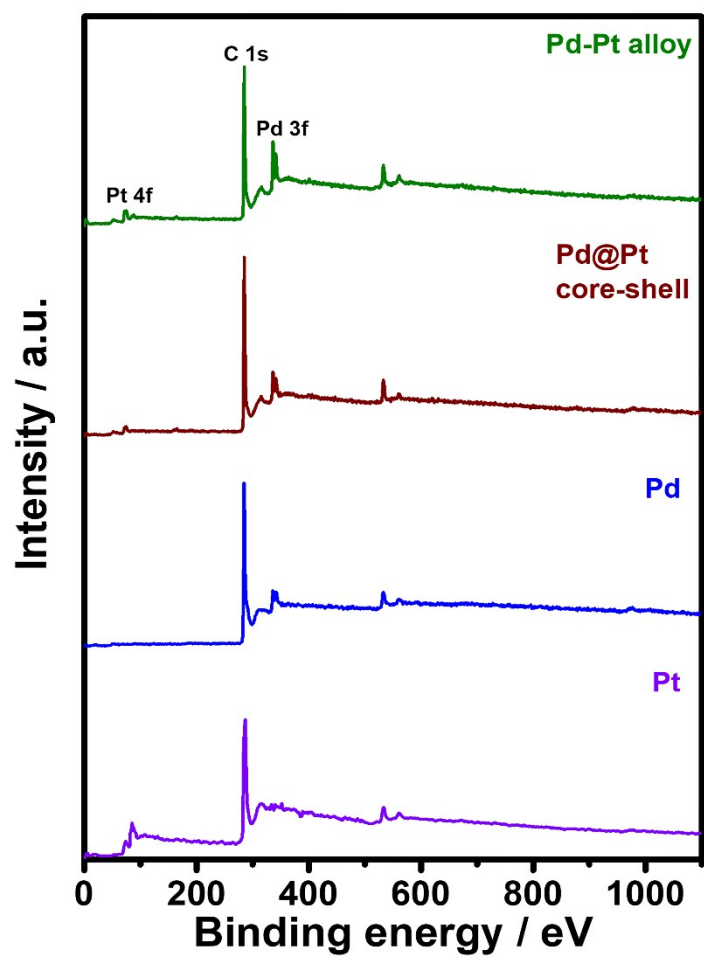

**Fig. S3.** The XPS survey spectra of Pd-Pt alloy, Pd@Pt core-shell, Pd, and Pt nanocubes.

**Table S1.** The comparison of EDS and ICP-OES results for Pd-Pt alloy and Pd@Pt core-shell nanocubes.

| <b>Catalyst</b>         | <b>EDS Element</b> |              | <b>ICP-OES</b> |              |
|-------------------------|--------------------|--------------|----------------|--------------|
|                         | <b>Pd</b>          | <b>Pt</b>    | <b>Pd</b>      | <b>Pt</b>    |
| <b>Pd-Pt alloy</b>      | <b>76.20</b>       | <b>23.80</b> | <b>74.33</b>   | <b>25.67</b> |
| <b>Pd@Pt core-shell</b> | <b>72.03</b>       | <b>27.97</b> | <b>72.88</b>   | <b>27.12</b> |

**Table S2.** Table as compared the lattice distance from XRD pattern and TEM images of different nanocubes.

| <b>Catalyst</b>             | <b>XRD pattern</b> | <b>TEM image</b> |
|-----------------------------|--------------------|------------------|
| <b>PdPt alloy</b>           | 1.95 Å             | 1.95 Å           |
| <b>Pd@Pt<br/>core-shell</b> | 1.95 Å             | 1.95 Å           |
| <b>Pd</b>                   | 1.94 Å             | 1.94 Å           |
| <b>Pt</b>                   | 1.96 Å             | 1.96 Å           |

**Table S3.** XPS spectra of Pt 4f core levels for nanocubes with different atomic distribution.

| Catalyst         | Pt 4f <sub>5/2</sub> |                 | Pt 4f <sub>7/2</sub> |                 |
|------------------|----------------------|-----------------|----------------------|-----------------|
|                  | Pt <sup>2+</sup>     | Pt <sup>0</sup> | Pt <sup>2+</sup>     | Pt <sup>0</sup> |
| Pd-Pt alloy      | 75.51 eV             | 74.72 eV        | 71.99 eV             | 71.36 eV        |
| Pd@Pt core-shell | 75.52 eV             | 74.79 eV        | 71.92 eV             | 71.39 eV        |
| Pt               | 75.55 eV             | 75.00 eV        | 72.37 eV             | 71.58 eV        |
| Pd               | -                    | -               | -                    | -               |

**Table S4.** XPS spectra of Pd 3d core levels for nanocubes with different atomic distribution.

| Catalyst         | Pd 3d <sub>3/2</sub> |                 | Pd 3d <sub>5/2</sub> |                 |
|------------------|----------------------|-----------------|----------------------|-----------------|
|                  | Pd <sup>2+</sup>     | Pd <sup>0</sup> | Pd <sup>2+</sup>     | Pd <sup>0</sup> |
| Pd-Pt alloy      | 342.90 eV            | 341.17 eV       | 336.76 eV            | 335.88 eV       |
| Pd@Pt core-shell | 342.57 eV            | 341.12 eV       | 336.90 eV            | 335.85 eV       |
| Pd               | 342.18 eV            | 341.08 eV       | 336.48 eV            | 335.76 eV       |
| Pt               | -                    | -               | -                    | -               |
